# Supplementary material
Source: publisher site journal article supplement (https://www.dovepress.com/article/363935)
Supplement: Supplementary file 1 [file get_supplementary_file.php]

# Supplementary materials

**Supplement 1.** Cut-off value for clinical utility of AECOPD identification tool

**Supplement 2.** Cut-off value for clinical utility of AECOPD severity tool

**Table S1.** Inclusion and exclusion criteria

**Table S2.** Candidate variables for primary analysis

**Table S3.** Candidate variables for secondary analysis

**Table S4.** Patient demographics and baseline characteristics (patients with AECOPD)

**Table S5.** COPD knowledge based on COPD-Q (FAS)

# Supplement 1. Cut-off value for clinical utility of AECOPD identification tool

The predicted AECOPD score is denoted as: .

a

b

The predicted risk of developing AECOPD () can then be calculated using the score and the following equation:

The optimal cut-off value corresponding to the Youden index is 0.374.

aWe assigned the following values for GOLD classification: 0=non-COPD with respiratory symptoms, 1=GOLD I, 2=GOLD II, 3=GOLD III, 4=GOLD IV. bWe assigned the following values for phlegm color: 1=clear phlegm, 3=yellowish orange phlegm, 5=dark green phlegm. AECOPD, acute exacerbation of chronic obstructive pulmonary disease; CAT, COPD assessment test; GOLD, Global Initiative for Chronic Obstructive Lung Disease.

# Supplement 2. Cut-off value for clinical utility of AECOPD severity tool

The predicted AECOPD severity score is denoted as: .

The predicted risk for severe AECOPD () can then be calculated using the score and the following equation:

The optimal cut-off value corresponding to the Youden index is 0.405.

AECOPD, acute exacerbation of chronic obstructive pulmonary disease; CAT, COPD assessment test; COPD, chronic obstructive pulmonary disease.

# Table S1. Inclusion and exclusion criteria

| **Inclusion criteria** | |
| --- | --- |
| ≥40 years of age | |
| Moderate/severe stable COPD a | Diagnosis of COPD |
| Predicted ratio of FEV1/FVC <0.70 |
| FEV1 <0.8 predicted |
| AECOPD a (previously diagnosed with COPD) | Diagnosis of COPD |
| Predicted ratio of FEV1/FVC <0.70 |
| Consulted the outpatient clinic or emergency department due to acute worsening of respiratory symptoms with an AECOPD (diagnosed by more than two clinical experts) |
| Non-COPD | Chronic respiratory symptoms (cough, sputum, wheeze, and dyspnea) |
| ≥2 high-risk factors (symptoms, exposure, health history and recent history of respiratory event) |
| **Exclusion criteria** | |
| Presence of severe cardiovascular disease | |
| Lung cancer | |
| Esophageal cancer or mediastinal tumors | |
| Participation in any drug clinical trials within 4 weeks prior to enrollment | |
| Severe infection | |
| Mental illness and poor compliance | |
| Deemed inappropriate for inclusion by the investigator | |

a Diagnosed according to the Global Initiative for Chronic Obstructive Lung Disease (GOLD) 2017 criteria. AECOPD, acute exacerbation of chronic obstructive pulmonary disease; COPD, chronic obstructive pulmonary disease; FEV1, forced expiratory volume in 1 second; FVC, forced vital capacity.

# Table S2. Candidate variables for primary analysis

| **Category** | **Candidate variable** | **Value** |
| --- | --- | --- |
| Demographic data | Age | Continuous |
| Gender | 0=male, 1=female |
| Race | Only Asian |
| Exposure | Dust | 0=no, 1=yes |
| Harmful gases | 0=no, 1=yes |
| Biofuels | 0=no, 1=yes |
| Other materials | 0=no, 1=yes |
| Vital signs | Heart rate (HR) | 0=other, 1= 55 bpm<HR≤100 bpm |
| Respiratory rate (RR) | 0= RR≤20 bpm, 1= RR>20 bpm |
| Body temperature (BT) | 0=other, 1= 36°C<BT≤37°C |
| BMI | 0=other, 1= 18≤BMI≤24 |
| Respiratory disease history | Most recent exacerbation in the past 12 months | 0=no, 1=yes |
| Number of exacerbations in the past 12 months | Continuous |
| Number of exacerbations in the past 12 months resulting in emergency room treatment | Continuous |
| Number of exacerbations in the past 12 months resulting in hospitalization | Continuous |
| Number of exacerbations in the past 12 months resulting in outpatient treatment | Continuous |
| Any allergy | 0=no, 1=yes |
| Bronchiectasis | 0=no, 1=yes |
| Obstructive chronic bronchitis | 0=no, 1=yes |
| Asthma | 0=no, 1=yes |
| Allergic rhinitis | 0=no, 1=yes |
| GOLD classificationa | Continuous |
| Family history  Asthma  Atopic dermatitis  COPD  Chronic bronchitis  Emphysema  Other | 0=no, 1=yes |
| Substance use | Substance use | 0=never, 1=former, 2=current |
| Core symptoms (present) | Sputum evaluation | Continuous |
| Sputum difficulty | Continuous |
| Phlegm odor | 0=no peculiar smell, 1=stinky, 2=smelly, 3=stinky and smelly |
| Phlegm colorb | Continuous |
| Chest discomfort | Continuous |
| Chest pain | Continuous |
| Chest tightness | Continuous |
| Shortness of breath | Continuous |
| Time of onset of symptoms | 0=all the time, 1=morning symptoms, 2=at night, affecting sleep |
| Depression or anxiety | Continuous |
| CAT | Cough | Continuous |
| Phlegm (mucus) | Continuous |
| Chest tightness | Continuous |
| Breathlessness | Continuous |
| Limited when performing household activities | Continuous |
| Confidence in leaving home | Continuous |
| Sleep soundly | Continuous |
| Energy | Continuous |
| CAT total score | Continuous |
| mMRC grade | mMRC grade | Continuous |

Variables that are eligible as candidate variables for primary outcome analysis have ≤10% missing data. aWe assigned the following values for GOLD classification: 0=non-COPD with respiratory symptoms, 1=GOLD I, 2=GOLD II, 3=GOLD III, 4=GOLD IV. bWe assigned the following values for phlegm color: 1=clear phlegm, 3=yellowish orange phlegm, 5=dark green phlegm. BMI, body mass index; CAT, COPD assessment test; COPD, chronic obstructive pulmonary disease; GOLD, Global Initiative for Chronic Obstructive Lung Disease; mMRC, modified Medical Research Council.

# Table S3. Candidate variables for secondary analysis

| **Category** | **Candidate variable** | **Value** |
| --- | --- | --- |
| Demographic data | Age | Continuous |
| Gender | 0=male, 1=female |
| Race | Only Asian |
| Exposure | Dust | 0=no, 1=yes |
| Harmful gases | 0=no, 1=yes |
| Biofuels | 0=no, 1=yes |
| Other materials | 0=no, 1=yes |
| Vital signs | Heart rate (HR) | 0=other, 1=55 bpm<HR≤100 bpm |
| Respiratory rate (RR) | 0= RR≤20 bpm, 1= RR>20 bpm |
| Body temperature (BT) | 0=other, 1= 36°C<BT≤37°C |
| BMI | 0=other, 1= 18≤BMI≤24 |
| Respiratory disease history | Most recent exacerbation in the past 12 months | 0=no, 1=yes |
| Number of exacerbations in the past 12 months | Continuous |
| Number of exacerbations in the past 12 months resulting in emergency room treatment | Continuous |
| Number of exacerbations in the past 12 months resulting in hospitalization | Continuous |
| Number of exacerbations in the past 12 months resulting in outpatient treatment | Continuous |
| Any allergy | 0=no, 1=yes |
| Bronchiectasis | 0=no, 1=yes |
| Obstructive chronic bronchitis | 0=no, 1=yes |
| Asthma | 0=no, 1=yes |
| Allergic rhinitis | 0=no, 1=yes |
| GOLD classificationa | Continuous |
| Age at first diagnosis of COPD | Continuous |
| Family history  Asthma  Atopic dermatitis  COPD  Chronic bronchitis  Emphysema  Other | 0=no, 1=yes |
| Substance use | Substance use | 0=never, 1=former, 2=current |
| Core symptoms (only previous) | Chest congestion | Continuous |
| Cough evaluation | Continuous |
| Breathing difficulty | Continuous |
| Activity evaluation | Continuous |
| Sleep disturbance | Continuous |
| Energy | Continuous |
| Core symptoms (previous and present) | Sputum evaluation | Continuous |
| Sputum difficulty | Continuous |
| Phlegm odor | 0=no peculiar smell, 1=stinky, 2=smelly, 3=stinky and smelly |
| Phlegm colorb | Continuous |
| Chest discomfort | Continuous |
| Chest pain | Continuous |
| Chest tightness | Continuous |
| Shortness of breath | Continuous |
| Time of onset of symptoms | 0=all the time, 1=morning symptoms, 2=at night, affecting sleep |
| Depression or anxiety | Continuous |
| CAT | Cough | Continuous |
| Phlegm (mucus) | Continuous |
| Chest tightness | Continuous |
| Breathlessness | Continuous |
| Limited when performing household activities | Continuous |
| Confidence in leaving home | Continuous |
| Sleep soundly | Continuous |
| Energy | Continuous |
| CAT total score | Continuous |
| mMRC grade | mMRC grade | Continuous |

Variables that are eligible as candidate variables for primary outcome analysis have ≤10% missing data. aWe assigned the following values for GOLD classification: 0=non-COPD with respiratory symptoms, 1=GOLD I, 2=GOLD II, 3=GOLD III, 4=GOLD IV. bWe assigned the following values for phlegm color: 1=clear phlegm, 3=yellowish orange phlegm, 5=dark green phlegm. BMI, body mass index; CAT, COPD assessment test; COPD, chronic obstructive pulmonary disease; GOLD, Global Initiative for Chronic Obstructive Lung Disease; mMRC, modified Medical Research Council.

# Table S4. Patient demographics and baseline characteristics (patients with AECOPD)

|  | **Mild/moderate AECOPD (N=48)** | **Severe AECOPD (N=52)** |
| --- | --- | --- |
| **Male, n (%)** | 40 (83.3) | 47 (90.4) |
| **Age (years), mean±SD** | 66.5±9.3 | 67.7±6.9 |
| **Asian, n (%)** | 48 (100.0) | 52 (100.0) |
| **Exposure to noxious gas/particles for >3 months, n (%)**a |  |  |
| None | 44 (91.7) | 47 (90.4) |
| Dust | 2 (4.2) | 2 (3.8) |
| Harmful gas | 2 (4.2) | 2 (3.8) |
| Biofuels | 0 | 0 |
| Others | 0 | 0 |
| Missingb | 0 | 1 (1.9) |
| **Nicotine usage, n (%)** |  |  |
| Never | 8 (16.7) | 16 (30.8) |
| Current | 15 (31.3) | 9 (17.3) |
| Former | 25 (52.1) | 27 (51.9) |
| Missingb | 0 | 0 |
| **Number of cigarette pack years, mean±SD (n)** | 410.6±164.0 (40) | 357.2±217.0 (36) |
| **Vital signs, mean±SD** |  |  |
| Respiratory rate (breaths/min) | 19.9±2.9 | 19.7±1.7 |
| BMI (Kg/m2) | 22.2±3.4 | 22.0±3.0 |
| **Spirometry test, mean±SD (n)** |  |  |
| FEV1 (L) | 1.3±0.6 (25) | 1.0±0.3 (11) |
| FEV1/FVC ratio (%) | 50.8±11.3 (25) | 48.2±8.5 (11) |
| FEV1% predicted | 47.8±17.8 (25) | 37.2±10.7 (11) |
| PEF (L/min) | 202.8±104.5 (24) | 118.7±75.0 (11) |
| **Respiratory disease history in the past 12 months** |  |  |
| Most recent exacerbation (yes), n (%) | 45 (93.8) | 33 (63.5) |
| Number of exacerbations, mean±SD (n) | 1.8±1.5 (45) | 1.8±1.1 (33) |
| Number of exacerbations resulting in ≥1 emergency room treatment, mean±SD (n) | 2.5±1.7 (4) | 1.5±0.7 (2) |
| Number of exacerbations resulting in ≥1 hospitalization, mean±SD (n) | 1.1±0.4 (8) | 1.7±1.3 (18) |
| Number of exacerbations resulting in ≥1 outpatient treatment, mean±SD (n) | 1.5±1.1 (38) | 1.2±0.5 (19) |
| **Other respiratory diagnoses, n (%)** |  |  |
| Any allergy | 3 (6.3) | 9 (17.3) |
| Bronchiectasis | 5 (10.4) | 11 (21.2) |
| Obstructive chronic bronchitis | 12 (25.0) | 12 (23.1) |
| Asthma | 14 (29.2) | 12 (23.1) |
| Allergic rhinitis | 6 (12.5) | 4 (7.7) |
| **Time of onset of symptoms, n (%)** |  |  |
| Morning symptoms | 13 (27.1) | 22 (42.3) |
| Night symptoms (affect sleep) | 15 (31.3) | 16 (30.8) |
| All the time | 20 (41.7) | 14 (26.9) |
| **CAT total score,c mean±SD** | 15.9±8.3 | 18.7±8.7 |
| **mMRC grade,d mean±SD** | 1.6±1.0 | 2.3±1.2 |

aDust includes silica dust, coal dust, graphite dust, carbon black dust, and asbestos dust; harmful gas includes ammonia, nitrogen dioxide, sulfur dioxide, nitric oxide, and ethylene; biofuels includes agricultural, poultry manure, domestic sewage, and urban organic solid waste. bMissing variables will be considered as ‘no exposure’ or ‘no event’. cTotal scores from cough, phlegm (mucus), chest tightness, breathlessness, being limited when performing household activities, confident in leaving home, able to sleep soundly, and energy level. dScores rated 0–4 (Grade 0: I only get breathless with strenuous exercise; Grade 1: I get short of breath when hurrying on the level or walking up a slight hill; Grade 2: I walk slower than people of the same age on the level because of breathlessness, or I have to stop for breath when walking on my own pace on the level; Grade 3: I stop for breath after walking about 100 meters or after a few minutes on the level; Grade 4: I am too breathless to leave the house or I am breathless when dressing or undressing). AECOPD, acute exacerbation of chronic obstructive pulmonary disease; BMI, body mass index; CAT, COPD assessment test; COPD, chronic obstructive pulmonary disease; FEV1, forced expiratory volume in 1 second; FVC, forced vital capacity; mMRC, modified Medical Research Council; PEF, peak expiratory flow; SD, standard deviation.

# Table S5. COPD knowledge based on COPD-Q (FAS)

| **Item** | **Correct answer** | **COPD (N=74)** | | **AECOPD (N=100)** | | **Non-COPD (N=72)** | | **Total (N=246)** | |
| --- | --- | --- | --- | --- | --- | --- | --- | --- | --- |
| **Number (%) correct** | **Rank** | **Number (%) correct** | **Rank** | **Number (%) correct** | **Rank** | **Number (%) correct** | **Rank** |
| People with COPD may feel short of breath | True | 65 (87.8) | 1 | 90 (90.0) | 1 | 37 (51.4) | 2 | 192 (78.0) | 1 |
| Cigarette smoking or secondhand smoke causes most COPD | True | 50 (67.6) | 3 | 79 (79.0) | 2 | 46 (63.9) | 1 | 175 (71.1) | 2 |
| People with COPD often have a cough that will not go away | True | 41 (55.4) | 4 | 65 (65.0) | 3 | 28 (38.9) | 5 | 134 (54.5) | 4 |
| Using oxygen at home can help people with COPD live longer | True | 38 (51.4) | 6 | 63 (63.0) | 4 | 21 (29.2) | 7 | 122 (49.6) | 5 |
| COPD can be prevented | True | 56 (75.7) | 2 | 56 (56.0) | 5 | 34 (47.2) | 3 | 146 (59.3) | 3 |
| COPD can be reversed | False | 26 (35.1) | 11 | 51 (51.0) | 6 | 17 (23.6) | 9 | 94 (38.2) | 8 |
| People should only use their COPD inhalers (medications) when they cannot breathe | False | 36 (48.6) | 7 | 49 (49.0) | 7 | 23 (31.9) | 6 | 108 (43.9) | 7 |
| People can stop taking their long-acting breathing medications (inhalers) when their COPD symptoms get better | False | 41 (55.4) | 5 | 46 (46.0) | 8 | 30 (41.7) | 4 | 117 (47.6) | 6 |
| People with COPD should get  a pneumonia shot | True | 27 (36.5) | 10 | 39 (39.0) | 9 | 18 (25.0) | 8 | 84 (34.1) | 9 |
| The medicine albuterol (inhaler) can be used anytime you are short of breath | True | 28 (37.8) | 9 | 37 (37.0) | 10 | 15 (20.8) | 10 | 80 (32.5) | 10 |
| People with COPD should have a flu shot every year | True | 30 (40.5) | 8 | 33 (33.0) | 11 | 14 (19.4) | 11 | 77 (31.3) | 11 |
| COPD medicines keep the disease from getting worse | False | 7 (9.5) | 12 | 12 (12.0) | 12 | 13 (18.1) | 12 | 32 (13.0) | 12 |
| Stopping smoking will keep COPD from getting worse | False | 6 (8.1) | 13 | 10 (10.0) | 13 | 8 (11.1) | 13 | 24 (9.8) | 13 |
| **Total scores, mean±SD** |  | 6.1±2.0 | | 6.3±2.1 | | 4.2±2.6 | | 5.6±2.4 | |

AECOPD, acute exacerbation of chronic obstructive pulmonary disease; COPD, chronic obstructive pulmonary disease; COPD-Q, COPD knowledge questionnaire; FAS, full analysis set; SD, standard deviation.
